# Supplementary material for: Laser-assisted electrohydrodynamic printing of sub-microscale 3D conductive features on low-melting-point polymeric substrates
Source: Royal Society of Chemistry journal article supplement (doi:10.1039/d5nr03296b), 2025-01-01
Supplement: d5nr03296b1.pdf [file d5nr03296b1.pdf]

# Supplementary Information

2

## Laser-assisted electrohydrodynamic printing of sub-microscale 3D conductive features on low-melting-point polymeric substrates

5 Jiaxin Li<sup>1,2,3</sup>, Jinke Chang<sup>4</sup>, Yuhua Chen<sup>1,2,3</sup>, Qihang Ma<sup>1,2,3</sup>, Kun Yu<sup>1,2,3</sup>, Yi Ding<sup>1,2,3</sup>, Dichen

6 Li<sup>1,2,3</sup>, Jiankang He<sup>1,2,3</sup> \*

7

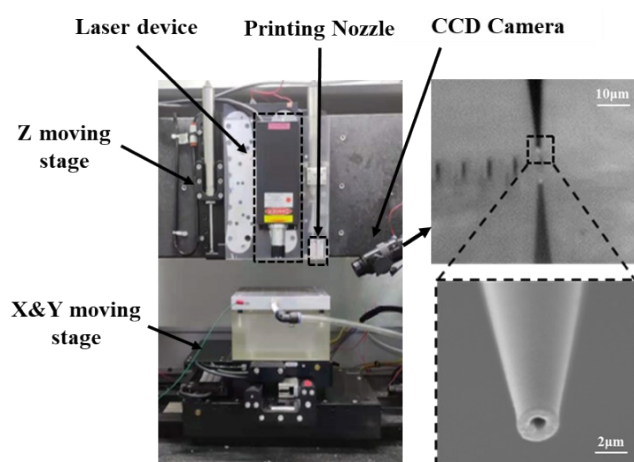

8

9 **Figure S1.** Laser-assisted EHD printing system.

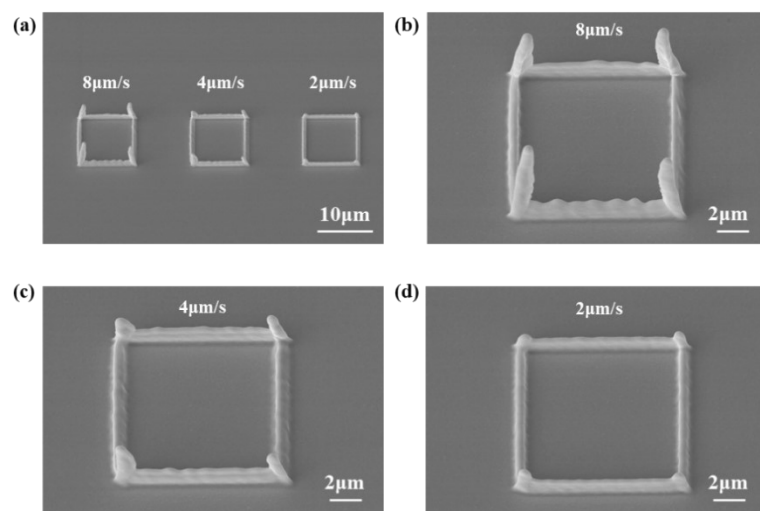

10

11 **Figure S2.** EHD printed a sub-microscale wall with different printing speeds.

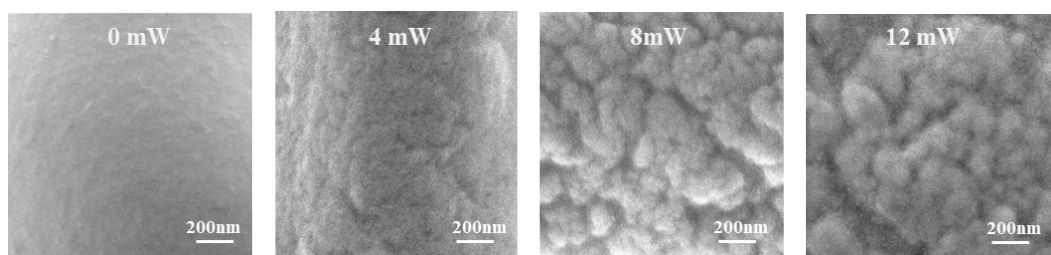

1  
2 **Figure S3.** SEM image of surface morphology of EHD-printed wall sintered with laser powers  
3 of 0, 4, 8, and 12 mW.

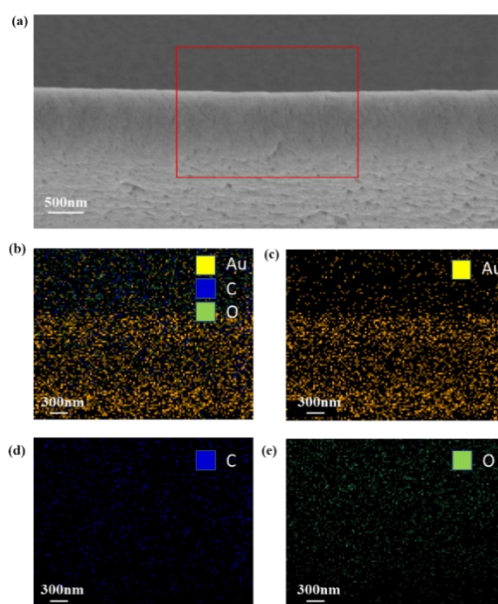

4  
5 **Figure S4.** Energy dispersive X-ray spectroscopy (EDX) maps of the printed wall.

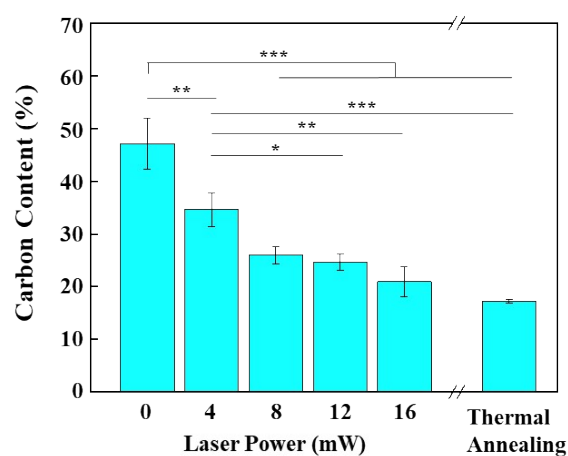

6  
7 **Figure S5.** Effect of laser power on the carbon content of EHD-printed structures measured by X-  
8 ray Photoelectron Spectroscopy (XPS) (mean  $\pm$  s.d.,  $n = 3$ ). Statistical comparisons were conducted  
9 using one-way Analysis of Variance with Tukey's test to determine statistical significance among  
10 multiple groups. The levels of significance were established at  $*P < 0.05$ ,  $**P < 0.01$ ,  $***P < 0.001$ .

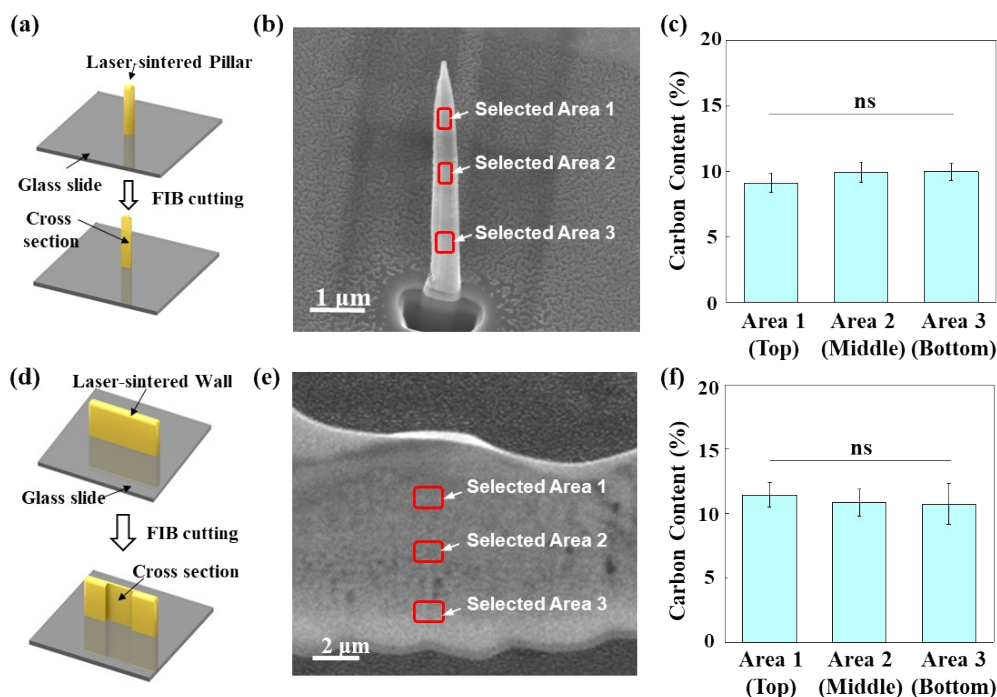

1

2 **Figure S6.** Carbon content across the cross-section of different printed structures. (a) Schematic of  
3 the laser-sintered pillar sectioned longitudinally by via Focused Ion Beam (FIB). (b) SEM image of  
4 the cross-section of the laser-sintered pillar and the selected area at different heights. (c) Carbon  
5 content of the chosen areas (mean  $\pm$  s.d.,  $n = 3$ ). (d) Schematic of the laser-sintered wall sectioned  
6 longitudinally by FIB. (e) SEM image of the cross-section of the laser-sintered pillar and the selected  
7 area at different heights. (f) Carbon content of the chosen areas (mean  $\pm$  s.d.,  $n = 3$ ). Statistical  
8 comparisons were performed using one-way Analysis of Variance with Tukey's tests to assess  
9 significance among multiple groups, and no significant differences were observed (ns).

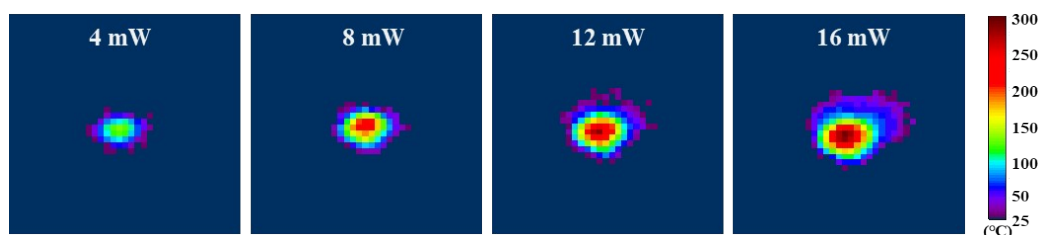

10

11 **Figure S7.** Infrared thermal images depict the laser spot during the laser sintering of gold  
12 nanoparticle ink at varied laser powers. To facilitate infrared observation, the laser spot was  
13 intentionally defocused and enlarged to approximately 40  $\mu\text{m}$ . Accordingly, the laser power was  
14 increased by a factor of 16 from the labeled value to maintain a constant power density.

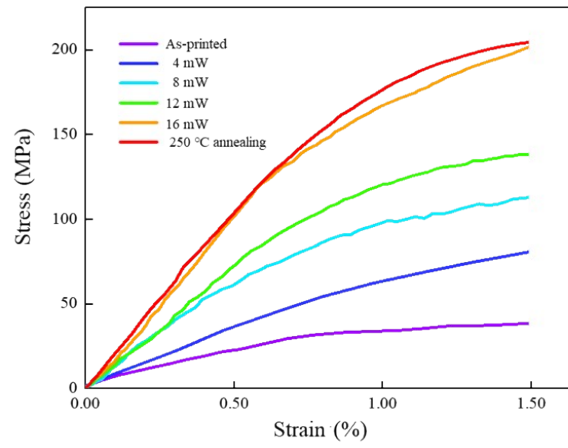

1  
2 **Figure S8.** Stress–strain curves of the printed micropillars, showing the mechanical performance  
3 achieved by *in-situ* laser sintering (across a range of powers) versus conventional thermal sintering  
4 at 250 °C.

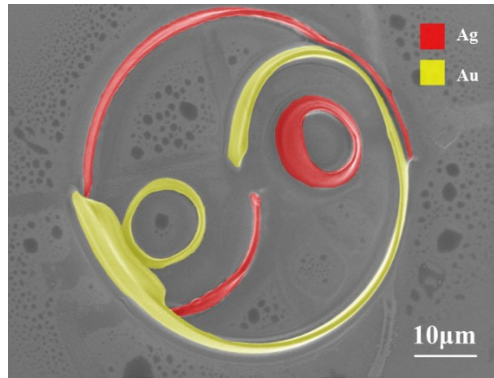

5  
6 **Figure S9.** Multimaterial Taiji pattern printed by laser-assisted EHD printing.  
7

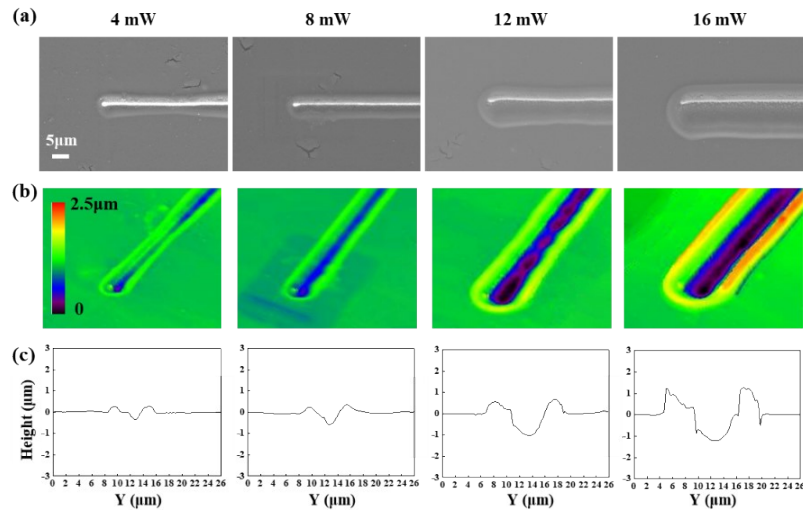

8  
9 **Figure S10.** Effect of laser sintering on PET film. (a) SEM images of the laser-sintered sub-  
10 microscale electrode on PET film with laser powers of 4, 8, 12, and 16 mW. (b) Microscopic images  
11 of the laser-sintered sub-microscale electrode on PET film with various laser powers. (c) Cross-  
12 section of laser-sintered sub-microscale electrode on PET film with various laser powers.

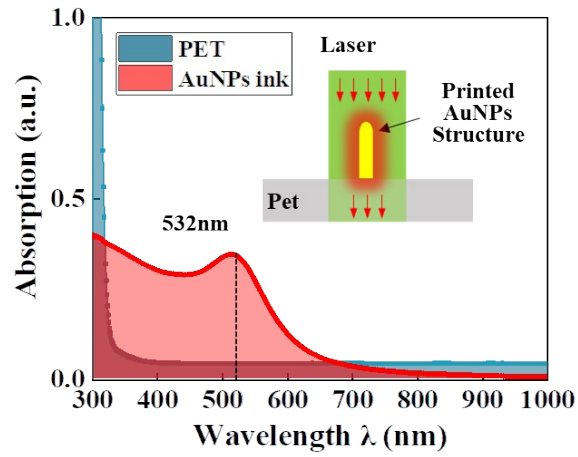

**Figure S11.** Absorption spectroscopy of PET film and AuNPs ink.

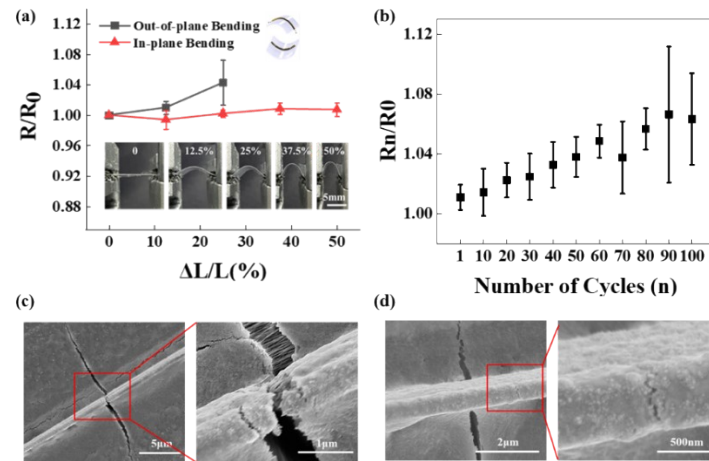

**Figure S12.** Cyclic mechanical testing of printed gold lines on PET film.

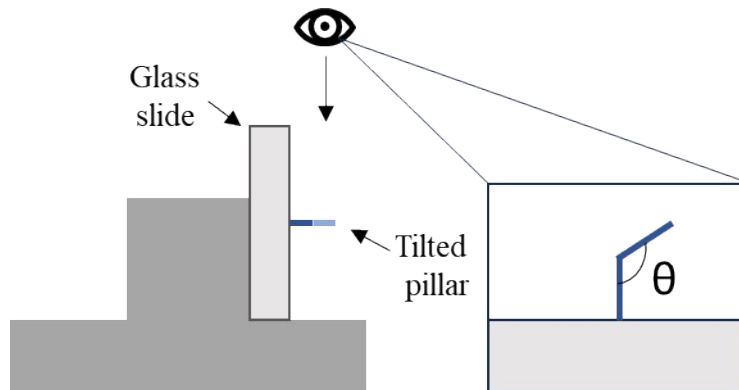

**Figure S13.** Schematic of SEM observation and tilting angle measurement for printed pillars.

| Printed Structure  | Nozzle diameter | Gas pressure | Peak Voltage | Voltage Frequency | Duty Ratio | Nozzle-to-collector distance | Printing Speed                            |
|--------------------|-----------------|--------------|--------------|-------------------|------------|------------------------------|-------------------------------------------|
| Micropillar        | 1 $\mu\text{m}$ | 34 mbar      | 250          | 1 kHz             | 50%        | 15 $\mu\text{m}$             | X/Y axis: 0 nm/s<br>Z axis: 0 or 400 nm/s |
| Tilted micropillar | 1 $\mu\text{m}$ | 34 mbar      | 250          | 1 kHz             | 50%        | 15 $\mu\text{m}$             | X/Y axis: 100-600 nm/s<br>Z axis: 0 nm/s  |
| Microwall          | 1 $\mu\text{m}$ | 34 mbar      | 250          | 1 kHz             | 50%        | 15 $\mu\text{m}$             | X/Y axis: 800 nm/s<br>Z axis: 0 nm/s      |

1

2 **Table S1.** Summary of the EHD printing parameters for different printed structures in this study.

| Figure Number | Laser spot diameter | Laser power          | Laser scanning speed |
|---------------|---------------------|----------------------|----------------------|
| Figure 3a,e   | 10 $\mu\text{m}$    | 0, 4, 8, 12, 16 mW   | 1 mm/s               |
| Figure 3c     | 10 $\mu\text{m}$    | 8 mW                 | 1 mm/s               |
| Figure 4b     | 10 $\mu\text{m}$    | 4, 8, 12, 16 mW      | 0.1, 1, 10 mm/s      |
| Figure 4c     | 10 $\mu\text{m}$    | 0, 4, 8, 12 mW       | 1 mm/s               |
| Figure 4d,e   | 10 $\mu\text{m}$    | 0, 4, 8, 12, 16 mW   | 1 mm/s               |
| Figure 4g     | 40 $\mu\text{m}$    | 64, 128, 192, 256 mW | 1 mm/s               |
| Figure 5b     | 10 $\mu\text{m}$    | 0, 4, 8, 12, 16 mW   | 1 mm/s               |
| Figure 5d     | 10 $\mu\text{m}$    | 8 mW                 | 1 mm/s               |
| Figure 6      | 10 $\mu\text{m}$    | 8 mW                 | 1 mm/s               |

3

4 **Table S2.** Summary of the laser sintering parameters employed for the printed structures throughout  
5 the figures.
